# Supplementary material for: Comparative Mitogenome of Phylogenetic Relationships and Divergence Time Analysis within Potamanthidae (Insecta: Ephemeroptera)
Source: MDPI journal article supplement (doi:10.3390/insects15050357), 2024-05-15
Supplement: s1 [file s1]

**Table S1.** Sources of mitochondrial genomic data other than in this study.

| S/N | Species                             | Family         | Accession No. | Reference         |
|-----|-------------------------------------|----------------|---------------|-------------------|
| 1   | <i>Ameletus</i> sp. 1 MT-2014       | Ameletidae     | KM244682      | [57]              |
| 2   | <i>Cloeon</i> dipterum              | Baetidae       | MW149047      | [58]              |
| 3   | <i>Baetis</i> sp. PC-2010           | Baetidae       | GU936204      | [59]              |
| 4   | <i>Takobia yixiani</i>              | Baetidae       | GU479735      | [59]              |
| 5   | <i>Nigrobaetis niger</i>            | Baetidae       | MT483692      | Direct Submission |
| 6   | <i>Procloeon bifidum</i>            | Baetidae       | MT483677      | Direct Submission |
| 7   | <i>Caenis</i> sp. JYZ-2020          | Caenidae       | MN356096      | [60]              |
| 8   | <i>Caenis</i> sp. JYZ-2018          | Caenidae       | MG910499      | [61]              |
| 9   | <i>Caenis horaria</i>               | Caenidae       | MT622520      | Direct Submission |
| 10  | <i>Caenis robusta</i>               | Caenidae       | MT584126      | Direct Submission |
| 11  | <i>Caenis robusta</i>               | Caenidae       | MT628575      | Direct Submission |
| 12  | <i>Caenis pycnacantha</i>           | Caenidae       | GQ502451      | Unpublished       |
| 13  | <i>Torleya mikali</i>               | Ephemerellidae | MT535766      | [62]              |
| 14  | <i>Cincticostella fusca</i>         | Ephemerellidae | MT535767      | [62]              |
| 15  | <i>Torleya nepalica</i>             | Ephemerellidae | MT274132      | [68]              |
| 16  | <i>Torleya grandiforceps</i>        | Ephemerellidae | MT274131      | [68]              |
| 17  | <i>Serratella zapekinae</i>         | Ephemerellidae | MT274130      | [68]              |
| 18  | <i>Ephemerella</i> sp. Yunnan-2018  | Ephemerellidae | MT274127      | [68]              |
| 19  | <i>Serratella</i> sp. Liaoning-2019 | Ephemerellidae | MT274128      | [68]              |
| 20  | <i>Serratella ignita</i>            | Ephemerellidae | MT628582      | Direct Submission |
| 21  | <i>Ephemerella</i> sp. MT-2014      | Ephemerellidae | KM244691      | [57]              |
| 22  | <i>Vietnamella sinensis</i>         | Viemamellidae  | OK265111      | [33]              |
| 23  | <i>Ephemera serica</i>              | Ephemerellidae | OK018134      | Direct Submission |
| 24  | <i>Hexagenia rigida</i>             | Ephemerellidae | OL678102      | [21]              |
| 25  | <i>Ephemera orientalis</i>          | Ephemerellidae | EU591678      | [64]              |
| 26  | <i>Ephemera</i> sp. XL-2019         | Ephemerellidae | MK951659      | [70]              |
| 27  | Heptagenidae sp. YW03BF02           | Heptagenidae   | MK642300      | [44]              |
| 28  | <i>Epeorus</i> sp. 06 ZXM-2022a     | Heptagenidae   | OK495706      | [65]              |
| 29  | <i>Epeorus</i> sp. 05 ZXM-2022a     | Heptagenidae   | OK495705      | [65]              |
| 30  | <i>Epeorus psi</i>                  | Heptagenidae   | OK495704      | [65]              |
| 31  | <i>Epeorus dayongensis</i>          | Heptagenidae   | OK495703      | [65]              |
| 32  | <i>Epeorus</i> sp. 04 ZXM-2022a     | Heptagenidae   | OK495702      | [65]              |
| 33  | <i>Epeorus herklotsi</i>            | Heptagenidae   | OK495701      | [65]              |
| 34  | <i>Epeorus</i> sp. 03 ZXM-2022a     | Heptagenidae   | OK495700      | [65]              |
| 35  | <i>Epeorus alexandri</i>            | Heptagenidae   | OK495699      | [65]              |
| 36  | <i>Epeorus</i> sp. 02 ZXM-2022a     | Heptagenidae   | OK495698      | [65]              |
| 37  | <i>Epeorus rhithralis</i>           | Heptagenidae   | OK495697      | [65]              |
| 38  | <i>Epeorus bispinosus</i>           | Heptagenidae   | OK495696      | [65]              |
| 39  | <i>Epeorus aculeatus</i>            | Heptagenidae   | OK495695      | [65]              |
| 40  | <i>Epeorus</i> sp. 01 ZXM-2022a     | Heptagenidae   | OK495694      | [65]              |
| 41  | <i>Epeorus unispinosus</i>          | Heptagenidae   | OK495693      | [65]              |
| 42  | <i>Cinygmina</i> sp. 07BF96         | Heptagenidae   | MW450878      | [44]              |
| 43  | <i>Stenonema femoratum</i>          | Heptagenidae   | MK642306      | [44]              |
| 44  | <i>Stenacron interpunctatum</i>     | Heptagenidae   | MK642305      | [44]              |
| 45  | <i>Maccaffertium vicarium</i>       | Heptagenidae   | MK642304      | [44]              |
| 46  | <i>Leucrocuta aphrodite</i>         | Heptagenidae   | MK642301      | [44]              |
| 47  | <i>Afronurus yixingensis</i>        | Heptagenidae   | MK642297      | [44]              |
| 48  | <i>Cinygmina</i> sp. 1 YW01BF06     | Heptagenidae   | MK642295      | [44]              |
| 49  | <i>Afronurus levis</i>              | Heptagenidae   | OQ863614      | Direct Submission |
| 50  | <i>Rhithrogena germanica</i>        | Heptagenidae   | MT584121      | Direct Submission |
| 51  | <i>Electrogena lateralis</i>        | Heptagenidae   | MT874480      | Direct Submission |
| 52  | <i>Paegniodes cupulatus</i>         | Heptagenidae   | MW381300      | [62]              |
| 53  | <i>Notacanthurus lamellosus</i>     | Heptagenidae   | MW381298      | [62]              |

|    |                                  |                      |          |                   |
|----|----------------------------------|----------------------|----------|-------------------|
| 54 | <i>Parafronurus youi</i>         | Heptagenidae         | EU349015 | [36]              |
| 55 | <i>Isonychia kiangsinensis</i>   | Isonychidae          | MH119135 | [66]              |
| 56 | <i>Isonychia ignota</i>          | Isonychidae          | HM143892 | Unpublished       |
| 57 | <i>Choroterpes yixingensis</i>   | Leptophlebiidae      | MW717290 | [67]              |
| 58 | <i>Deleatidium vernale</i>       | Leptophlebiidae      | OR414023 | Direct Submission |
| 59 | <i>Leptophlebia vespertina</i>   | Leptophlebiidae      | MT622515 | Direct Submission |
| 60 | <i>Leptophlebia marginata</i>    | Leptophlebiidae      | MT622514 | Direct Submission |
| 61 | <i>Habrophlebiodes zjiensis</i>  | Leptophlebiidae      | GU936203 | [59]              |
| 62 | <i>Potamanthellus edmundsi</i>   | Neophemeridae        | OK272543 | Direct Submission |
| 63 | <i>Neophemera projecta</i>       | Neophemeridae        | OK272542 | Direct Submission |
| 64 | <i>Ephoron yunnanensis</i>       | Polymitarcyidae      | MF352159 | [68]              |
| 65 | <i>Potamanthus kwangsiensis</i>  | Potamanthidae        | MF352158 | [68]              |
| 66 | <i>Rhoenanthus</i> sp.           | Potamanthidae        | MF352145 | [68]              |
| 67 | <i>Potamanthus</i> sp. MT-2014   | Potamanthidae        | KM244674 | [57]              |
| 68 | <i>Siphonurus immanis</i>        | Siphonuridae         | FJ606783 | Unpublished       |
| 69 | <i>Siphonurus aestivalis</i>     | Siphonuridae         | MT862395 | Direct Submission |
| 70 | <i>Siphonurus</i> sp. MT-2014    | Siphonuridae         | KM244684 | [57]              |
| 71 | <i>Siphuriscus chinensis</i>     | Siphuriscidae        | HQ875717 | [69]              |
| 72 | <i>Siphuriscus</i> sp. I JZ-2022 | Siphuriscidae        | ON729391 | [20]              |
| 73 | <i>Teloganodidae</i> sp.         | <i>Teloganodidae</i> | KM244703 | [57]              |

---
