# Supplementary material for: Comparative Mitogenome of Phylogenetic Relationships and Divergence Time Analysis within Potamanthidae (Insecta: Ephemeroptera)
Source: MDPI journal article supplement (doi:10.3390/insects15050357), 2024-05-15
Supplement: s1 [file s1]

**Table S5.** The resulting branch model when we used two different topology structures with two different foreground branches, respectively.

| Foregrou<br>nd<br>Branch | Model                | n<br>p | Ln L              | Estimates of parameters |                     |                     | Model compared                   | LRT P-<br>value | Omega for Foreground Branch |
|--------------------------|----------------------|--------|-------------------|-------------------------|---------------------|---------------------|----------------------------------|-----------------|-----------------------------|
| <i>R.<br/>coreanus</i>   | Two ratio<br>Model 2 | 1<br>9 | -41032.577533     | $\omega$ :              | $\omega$ 0= 0.03065 | $\omega$ 1= 0.02035 | Two ratio Model<br>2 vs. Model 0 | 0.002391843     | $\omega$ 1= 0.02035         |
|                          | Model 0              | 1<br>8 | -41037.188303     | $\omega$ =              | 0.02924             |                     |                                  |                 |                             |
| <i>P. luteus</i>         | Two ratio<br>Model 2 | 19     | -<br>42114.968291 | $\omega$ :              | $\omega$ 0= 0.03041 | $\omega$ 1=0.02982  | Two ratio Model 2<br>vs. Model 0 | 0.858612719     |                             |
|                          | Model 0              | 18     | -<br>42114.984158 | $\omega$ =              | 0.03032             |                     |                                  |                 |                             |
