# Supplementary material for: Comparative Mitogenome of Phylogenetic Relationships and Divergence Time Analysis within Potamanthidae (Insecta: Ephemeroptera)
Source: MDPI journal article supplement (doi:10.3390/insects15050357), 2024-05-15
Supplement: s1 [file s1]

**Table S4** The resulting site model when we used the topology structure with all species of Potamanthidae.

| Model | Ln L          | Estimates of parameters      |                                  |            |           | Model compared | LRT P-value | Positive sites                                                                                                                                                                                                                                                                                                                                                        |
|-------|---------------|------------------------------|----------------------------------|------------|-----------|----------------|-------------|-----------------------------------------------------------------------------------------------------------------------------------------------------------------------------------------------------------------------------------------------------------------------------------------------------------------------------------------------------------------------|
| M3    | -45424.794432 | p                            | 0.86440                          | 0.13560    | 0.00000   | M0 vs. M3      | 0.000000000 |                                                                                                                                                                                                                                                                                                                                                                       |
|       |               | $\omega$                     | 0.00722                          | 0.22051    | 189.32568 |                |             |                                                                                                                                                                                                                                                                                                                                                                       |
| M0    | -46213.183935 | $\omega_0$                   |                                  | 0.03054    |           | M1a vs. M2a    | 0.999940002 |                                                                                                                                                                                                                                                                                                                                                                       |
| M2a   | -45706.596285 | p                            | 0.95638                          | 0.04362    | 0.00000   |                |             |                                                                                                                                                                                                                                                                                                                                                                       |
|       |               | $\omega$                     | 0.01970                          | 1.00000    | 27.85669  |                |             |                                                                                                                                                                                                                                                                                                                                                                       |
| M1a   | -45706.596225 | p                            | 0.95638                          | 0.04362    |           |                |             |                                                                                                                                                                                                                                                                                                                                                                       |
|       |               | $\omega$                     | 0.01975                          | 1.00000    |           | M7 vs.M8       | 0.000000000 |                                                                                                                                                                                                                                                                                                                                                                       |
| M8    | -45428.898456 | p0= 0.98158<br>(p1= 0.01842) | p= 0.03045<br>$\omega$ = 1.00000 | q= 0.24021 |           |                |             |                                                                                                                                                                                                                                                                                                                                                                       |
|       |               |                              |                                  |            |           | M8a vs.M8      | 0.998404232 |                                                                                                                                                                                                                                                                                                                                                                       |
| M7    | -45526.861210 | p= 0.03218                   |                                  | q=0.23816  |           |                |             |                                                                                                                                                                                                                                                                                                                                                                       |
|       |               |                              |                                  |            |           |                |             | 256 S 0.625,258 R 0.984*,264 S 0.819,265<br>R 0.843,268 S 0.637,1834 Q 0.637,2040 D<br>0.579,2043 K 0.695,2044 F 0.796,2261 L<br>0.597,2262 T 0.812,2265 S 0.936,2311 C<br>0.743,2378 F 0.756,2828 R 0.524,3137 I<br>0.568,3141 W 0.871,3193 L 0.558,3198 D<br>0.566,3618 L 0.799,3621 R 0.544,3622 I<br>0.587,3643 F 0.696,3644 L 0.837,3646 S<br>0.677,3648 L 0.866 |
| M8a   | -45428.898454 | p0=0.98158<br>(p1= 0.01842)  | p=0.03006<br>$\omega$ = 1.00000  | q=0.23568  |           |                |             |                                                                                                                                                                                                                                                                                                                                                                       |
