# Supplementary material for: Comparative Mitogenome of Phylogenetic Relationships and Divergence Time Analysis within Potamanthidae (Insecta: Ephemeroptera)
Source: MDPI journal article supplement (doi:10.3390/insects15050357), 2024-05-15
Supplement: s1 [file s1]

**Table S3.** Divergence times for nodes/clades in the Ephemeroptera. All estimates are represented in millions of years ago (Mya), and “&” represents the relationship of two branches.

| <b>Nodes/Clades</b>                                                                                                                                                                                                                       | <b>Mean Divergence-time (Mya)</b> | <b>95 % HPD Range (Mya)</b> |
|-------------------------------------------------------------------------------------------------------------------------------------------------------------------------------------------------------------------------------------------|-----------------------------------|-----------------------------|
| Ephemeridae & Polymitarcyidae                                                                                                                                                                                                             | 70.70                             | 47.67-95.72                 |
| Potamanthidae & (Ephemeridae + Polymitarcyidae)                                                                                                                                                                                           | 64.77                             | 62.80-121.74                |
| Caenidae & Neoephemeridae                                                                                                                                                                                                                 | 94.75                             | 69.97-124.55                |
| (Potamanthidae + (Ephemeridae + Polymitarcyidae)) & (Caenidae + Neoephemeridae)                                                                                                                                                           | 115.13                            | 86.11-145.70                |
| Baetidae & Teloganodidae                                                                                                                                                                                                                  | 115.31                            | 91.96-135.86                |
| Ephemerellidae & Viemamellidae                                                                                                                                                                                                            | 98.80                             | 98.17-99.41                 |
| (Baetidae + Teloganodidae) & (Ephemerellidae + Viemamellidae)                                                                                                                                                                             | 133.91                            | 113.04-152.75               |
| ((Baetidae + Teloganodidae) + (Ephemerellidae + Viemamellidae)) & Leptophlebiidae                                                                                                                                                         | 141.26                            | 122.21-161.46               |
| ((Potamanthidae + (Ephemeridae + Polymitarcyidae)) + (Caenidae + Neoephemeridae)) & ((Baetidae + Teloganodidae) + (Ephemerellidae + Viemamellidae) + Leptophlebiidae)                                                                     | 149.12                            | 129.69-168.36               |
| ((((Potamanthidae + (Ephemeridae + Polymitarcyidae)) + (Caenidae + Neoephemeridae)) + ((Baetidae + Teloganodidae) + (Ephemerellidae + Viemamellidae) + Leptophlebiidae)) & Heptageniidae                                                  | 162.77                            | 146.40-180.14               |
| Ameletidae & Siphonuridae                                                                                                                                                                                                                 | 159.77                            | 158.98-160.58               |
| (((((Potamanthidae + (Ephemeridae + Polymitarcyidae)) + (Caenidae + Neoephemeridae)) + (((Baetidae + Teloganodidae) + (Ephemerellidae + Viemamellidae) + Leptophlebiidae)) + Heptageniidae) & (Ameletidae + Siphonuridae)                 | 171.82                            | 161.98-185.62               |
| ((((((Potamanthidae + (Ephemeridae + Polymitarcyidae)) + (Caenidae + Neoephemeridae)) + ((Baetidae + Teloganodidae) + (Ephemerellidae + Viemamellidae) + Leptophlebiidae)) + Heptageniidae) + (Ameletidae + Siphonuridae)) & Isonychiidae | 183.44                            | 167.02-202.64               |
