# Supplementary material for: Comparative Mitogenome of Phylogenetic Relationships and Divergence Time Analysis within Potamanthidae (Insecta: Ephemeroptera)
Source: MDPI journal article supplement (doi:10.3390/insects15050357), 2024-05-15
Supplement: s1 [file s1]

**Table S6.** The result of branch-site model when we used two different topology structures with two different foreground branches, respectively.

| Foregrou<br>nd<br>Branch | Model           | n<br>p | Ln L          | Estimates of parameters |         |         |              |              | Model<br>compared           | LRT P-<br>value | Positive sites                                                                                                                                                                                                                                                                                      |
|--------------------------|-----------------|--------|---------------|-------------------------|---------|---------|--------------|--------------|-----------------------------|-----------------|-----------------------------------------------------------------------------------------------------------------------------------------------------------------------------------------------------------------------------------------------------------------------------------------------------|
| <i>R. coreanus</i>       | MA              | 2<br>1 | -40669.658913 | Site class              | 0       | 1       | 2a           | 2b           | Model A vs.<br>Model A null | 0.345227577     | 218 S 0.942,762 I 0.737                                                                                                                                                                                                                                                                             |
|                          |                 |        |               | f                       | 0.96182 | 0.03745 | 0.00071      | 0.0000<br>3  |                             |                 |                                                                                                                                                                                                                                                                                                     |
|                          |                 |        |               | $\omega$ 0              | 0.01892 | 1.00000 | 0.01890      | 1.0000<br>0  |                             |                 |                                                                                                                                                                                                                                                                                                     |
|                          | Model A<br>null | 2<br>0 | -40670.104374 | $\omega$ 1              | 0.01890 | 1.00000 | 30.8802<br>5 | 30.880<br>25 | Model A vs.<br>Model A null | 0.103961041     | 13 T 0.566,347 L 0.877,420 F<br>0.962*,546 S 0.599,682 S<br>0.861,713 N 0.782,715 S 0.506,884<br>G 0.778,892 N 0.747,1374 P<br>0.500,1417 S 0.832,1454 V<br>0.596,1583 I 0.657,1702 P<br>0.849,1712 L 0.967*,1715 I<br>0.636,2091 A 0.852,2282 A<br>0.575,2464 N 0.914,3462 F<br>0.685,3466 S 0.878 |
|                          |                 |        |               | 1                       |         |         |              |              |                             |                 |                                                                                                                                                                                                                                                                                                     |
|                          |                 |        |               | Site class              | 0       | 1       | 2a           | 2b           |                             |                 |                                                                                                                                                                                                                                                                                                     |
| <i>P. luteus</i>         | MA              | 21     | -41634.650166 | f                       | 0.94670 | 0.04084 | 0.01195      | 0.00052      | Model A vs.<br>Model A null | 0.103961041     | 13 T 0.566,347 L 0.877,420 F<br>0.962*,546 S 0.599,682 S<br>0.861,713 N 0.782,715 S 0.506,884<br>G 0.778,892 N 0.747,1374 P<br>0.500,1417 S 0.832,1454 V<br>0.596,1583 I 0.657,1702 P<br>0.849,1712 L 0.967*,1715 I<br>0.636,2091 A 0.852,2282 A<br>0.575,2464 N 0.914,3462 F<br>0.685,3466 S 0.878 |
|                          |                 |        |               | $\omega$ 0              | 0.01819 | 1.00000 | 0.01819      | 1.00000      |                             |                 |                                                                                                                                                                                                                                                                                                     |
|                          |                 |        |               | $\omega$ 1              | 0.01819 | 1.00000 | 29.57838     | 29.57838     |                             |                 |                                                                                                                                                                                                                                                                                                     |
|                          | Model A<br>null | 20     | -41633.328315 | 1                       |         |         |              |              | Model A vs.<br>Model A null | 0.103961041     | 13 T 0.566,347 L 0.877,420 F<br>0.962*,546 S 0.599,682 S<br>0.861,713 N 0.782,715 S 0.506,884<br>G 0.778,892 N 0.747,1374 P<br>0.500,1417 S 0.832,1454 V<br>0.596,1583 I 0.657,1702 P<br>0.849,1712 L 0.967*,1715 I<br>0.636,2091 A 0.852,2282 A<br>0.575,2464 N 0.914,3462 F<br>0.685,3466 S 0.878 |
|                          |                 |        |               |                         |         |         |              |              |                             |                 |                                                                                                                                                                                                                                                                                                     |
|                          |                 |        |               |                         |         |         |              |              |                             |                 |                                                                                                                                                                                                                                                                                                     |
