# Supplementary figures and images for: Comparative Mitogenome of Phylogenetic Relationships and Divergence Time Analysis within Potamanthidae (Insecta: Ephemeroptera)
Source: MDPI journal article supplement (doi:10.3390/insects15050357), 2024-05-15

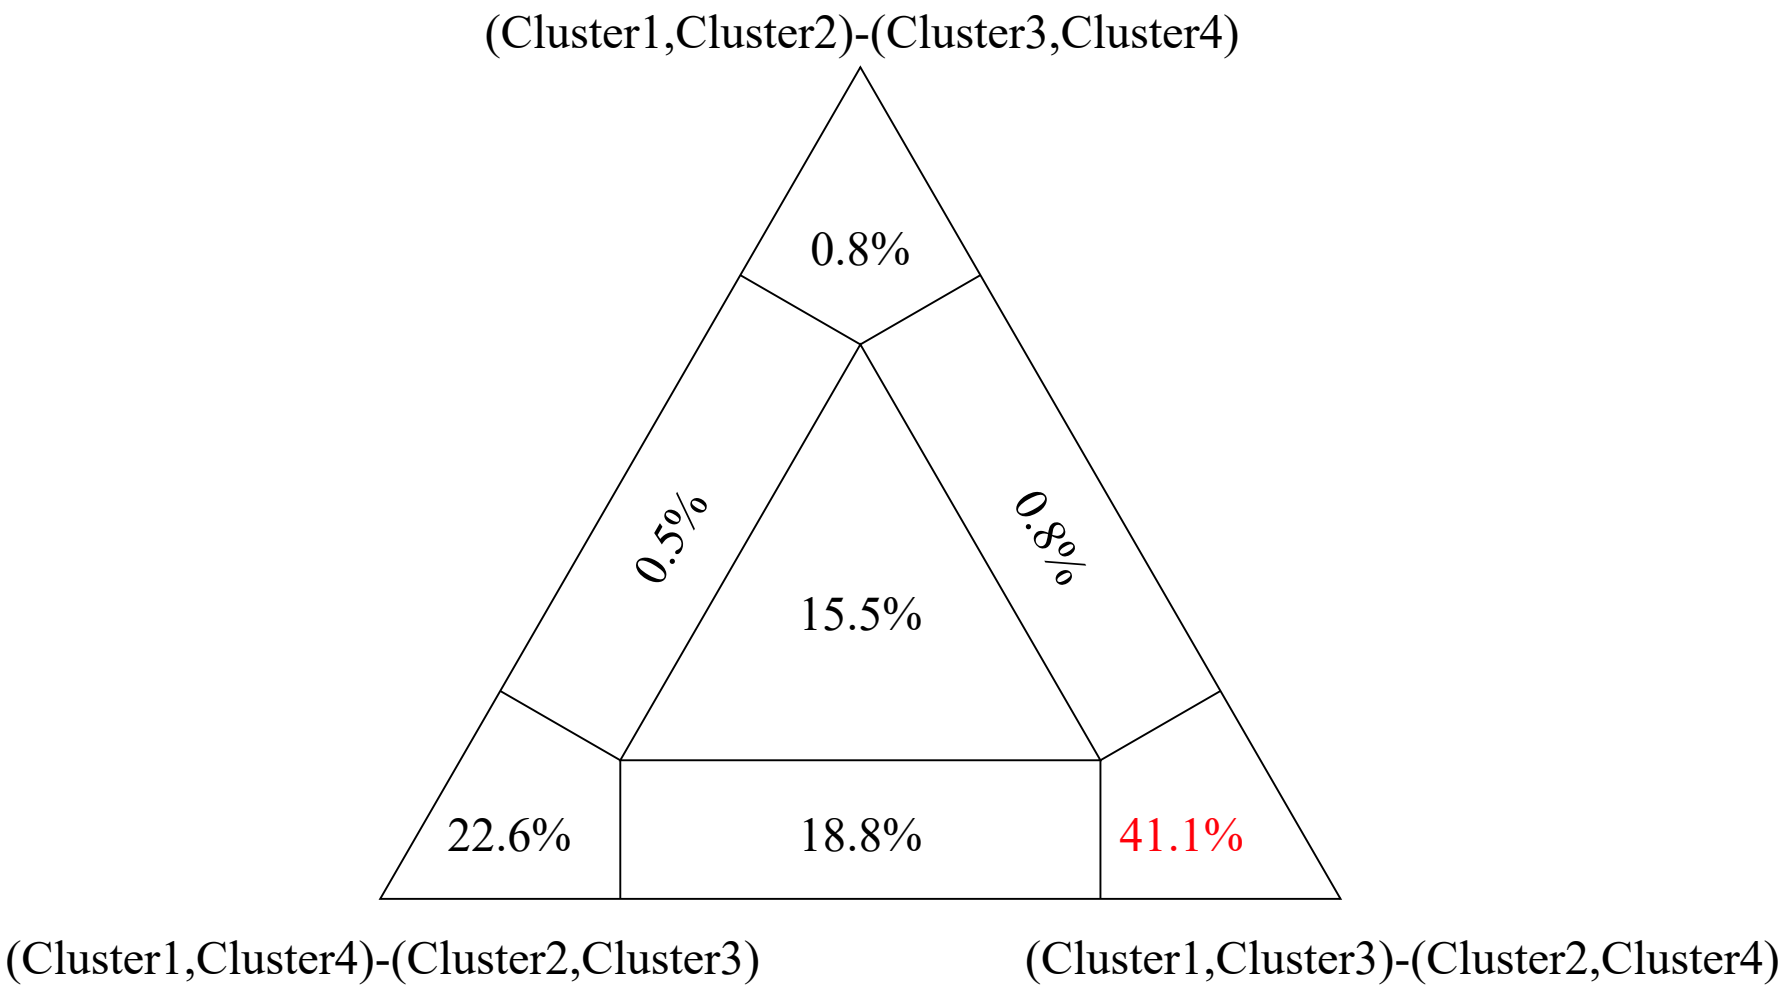

Supplement: s1 [file s1]
